# Supplementary material
Source: ML conference proceedings conference paper supplement (https://proceedings.neurips.cc/paper_files/paper/2022/hash/15972a9575e0f03bf82f00aebeb40774-Abstract.html)
Supplement: Supplementary file 1 [file 15972a9575e0f03bf82f00aebeb40774-Supplemental-Conference.pdf]

---

# S<sup>3</sup>GC: Scalable Self-Supervised Graph Clustering

---

**Fnu Devvrit\***

Department of Computer Science  
University of Texas at Austin  
devvrit.03@gmail.com

**Aditya Sinha<sup>†</sup>**

Google Research  
Bengaluru, India, 560016  
sinhaaditya@google.com

**Inderjit Dhillon**

Google & Department of Computer Science  
University of Texas at Austin  
isd@google.com

**Prateek Jain**

Google Research  
Bengaluru, India, 560016  
prajain@google.com

## Abstract

We study the problem of clustering graphs with additional side-information of node features. The problem is extensively studied, and several existing methods exploit Graph Neural Networks to learn node representations [29]. However, most of the existing methods focus on generic representations instead of their cluster-ability or do not scale to large scale graph datasets. In this work, we propose S<sup>3</sup>GC which uses contrastive learning along with Graph Neural Networks and node features to learn clusterable features. We empirically demonstrate that S<sup>3</sup>GC is able to learn the correct cluster structure even when graph information or node features are individually not informative enough to learn correct clusters. Finally, using extensive evaluation on a variety of benchmarks, we demonstrate that S<sup>3</sup>GC is able to significantly outperform state-of-the-art methods in terms of clustering accuracy – with as much as 5% gain in NMI – while being scalable to graphs of size 100M.

## 1 Introduction

Graphs are commonplace data structures to store information about entities/users, and have been investigated for decades [5, 15, 54, 31, 8, 57]. In modern ML systems, the entities/nodes are often equipped with *vector embeddings* from different sources. For example, authors are nodes in a citation graph and can be equipped with embeddings of the title/content of the authored papers [16, 41] as relevant side information. Owing to the utility of graphs in large-scale systems, tremendous progress has been made in the domain of supervised learning from graphs and node features, with Graph Neural Networks (GNNs) headlining the state-of-the-art methods [28, 19, 52]. However, typical real-world ML workflows start with unsupervised data analysis to better understand the data and design supervised methods accordingly. In fact, many times clustering is a key tool to ensure scalability to web-scale data [26]. Furthermore, even independent of supervised learning, clustering the graph data with node features is critical for a variety of real-world applications like recommendation, routing, triaging [6, 2, 32] etc.

Effective graph clustering methods should be scalable, especially with respect to the number of nodes, which can be in millions even for a moderate-scale system[57]. Furthermore, in the presence of side-information, the system should be able to use both the *views* – node features and graph information – of the data “effectively”. For example, the method should be more accurate than *single-view* methods that either consider only the graph information [27] or only the node feature

---

\*work done while the author was an intern at Google Research

<sup>†</sup>Now at University of Illinois, Urbana-Champaign

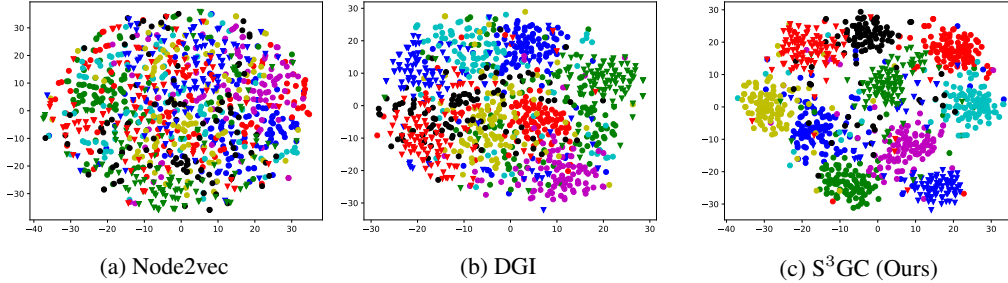

Figure 1: tSNE visualization of embeddings when applied to the data model given in Section 3.5. SBM parameters  $p, q$  are such  $p = q + .18$ , while  $\sigma_c = \sigma - .1$ , i.e., both graph information and feature information are separately insufficient for clustering (see Table 1).  $S^3GC$  is able to well-separate all the clusters while Node2vec [18] and DGI [53] have a significant amount of cluster overlap.

information [33, 43, 7]. This problem of graph clustering with side information has been extensively studied in the literature [61]; see Section 2 for a review of the existing and recent methods. Most methods map the problem to that of learning vector embeddings and then apply standard k-means [33] style clustering techniques. However, such methods – like Node2vec [18] – don’t explicitly optimize for clusterability, therefore the resulting embeddings might not be suitable for effective clustering. Furthermore, several existing methods tend to be highly reliant on the graph information and thus tend to perform poorly when graph information is noisy/incomplete. Finally, several existing methods such as GraphCL [58] propose expensive augmentation and training modules, and thus do not scale to realistic web-scale datasets.

We propose  $S^3GC$  which uses a one-layer GNN encoder to combine both the graph and node-feature information, along with graph only and node feature only encodings.  $S^3GC$  applies contrastive learning to ensure that the embedding of a node is close to “near-by” nodes – obtained by random walk – while being far away from all other nodes. That is,  $S^3GC$  explicitly addresses the above three mentioned challenges: a)  $S^3GC$  is based on contrastive learning which is known to promote linear separability and hence clustering [20], b)  $S^3GC$  carefully combines information from both the graph view and the feature view, thus performs well when one of the views is highly noisy/incomplete, c)  $S^3GC$  use a light-weight encoder and simple random walk based sampler/augmentation, and can be scaled to hundreds of millions of nodes on a single virtual machine (VM).

For example, consider a dataset where the adjacency matrix of the graph is sampled from a stochastic block model with 10 clusters; let probability of an edge between nodes from same cluster is  $p$  and from different clusters is  $q$ . Furthermore, features of each node are also sampled from a mixture of 10 Gaussians where  $\sigma_c$  is the distance between any two cluster centers while  $\sigma$  is the standard deviation of each Gaussian. Now, consider a setting where  $p > q$  but  $p, q$  are close, hence information from the graph structure is *weak*. Similarly,  $\sigma_c < \sigma$  but they are *close*. Figure 1 plots two-dimensional tSNE projection [51] of embeddings learned by the state-of-the-art Node2vec[18] and DGI[53] methods, along with  $S^3GC$ . Note that while Node2vec’s objective function is optimized well, the embeddings do not appear to be separable. DGI’s embeddings are better separated, still there is a significant overlap. In contrast,  $S^3GC$  is able to produce well-separated embeddings due to the contrastive learning objective along with explicit utilization of both data views.

We conduct extensive empirical evaluation of  $S^3GC$  and compare it to a variety of baselines and standard state-of-the-art benchmarks, particularly: Spectral Clustering[43], k-means[33], METIS[27], Node2vec[18], DGI[53], GRACE[62], MVGRL[21] and BGRL[48]. Overall, we observe that our method consistently outperforms Node2vec, DGI – SOTA scalable methods – on all seven datasets, achieving as much as 5% higher NMI than both the methods. For two small scale datasets, our method is competitive with MVGRL method, but MVGRL does not scale to even moderate sized datasets with about 2.5M nodes and 61M edges, while our method scales to datasets with 111M nodes and 1.6B edges.

## 2 Related Work

Below, we discuss works related to various aspects of graph clustering and self-supervised learning, and place our contribution in the context of these related works.

**Graph OR features-only clustering:** Graph clustering is a well-studied problem, and several techniques address the problem including Spectral Clustering (SC) [43], Graclus [12], METIS [27], Node2vec [18], and DeepWalk [40]. In particular, Node2Vec [18] is a probabilistic framework that is an extension to DeepWalk, and maps nodes to low-dimensional feature spaces such that the likelihood of preserving the local and global neighborhood of the nodes is maximized. In the setting of node-features only data, **k-means** clustering is one of the classical methods, in addition to several others like agglomerative clustering [44], density based clustering [59], and deep clustering [7].

As demonstrated in Figure 1 and Table 1, S<sup>3</sup>GC attempts to exploit both the views, and if both views are meaningful then it can be significantly more accurate than single-view methods.

**Self Supervised Learning:** Self-supervised learning methods have demonstrated that they can learn linearly separable features/representations in the absence of any labeled information. Typical approach is to define instance-wise “augmentations” and then pose the problem as that of learning contrastive representations that map instance augmentations close to the instance embedding, while pushing it far apart from all other instance embeddings. Popular examples include MoCo [22], MoCo v2 [11], SimCLR [9], and BYOL [17]. Such methods require augmentations, and as such do not apply directly to the graph+node-features clustering problem. S<sup>3</sup>GC uses simple random walk based augmentations to enable contrastive learning based techniques.

**Graph Clustering with Node Features:** To exploit both the graph and feature information, several existing works use the approach of autoencoder. That is, they encode nodes using Graph Neural Networks (GNN) [28], with the goal that inner-product of encodings can reconstruct the graph structure; GAE and VGAE [29] use this technique. GALA [38], ARGAE and ARVGA [37] extend the idea by using Laplacian Sharpening and generative adversarial learning. Structural Deep Clustering Network (SDCN) [4] jointly learns an Auto-Encoder (AE) along with a Graph Auto-Encoder (GAE) for better node representations, while Deep Fusion Clustering Network (DFCN) [50] merges the representations learned by AE and GAE for consensus representation learning. Since AE type approaches attempt to solve a much harder problem, their accuracy in practice lags significantly to the state-of-the-art; for example, see Table 3 in [21] which shows that such techniques can be 5-8% less accurate. MinCutPool [42] and DMoN [49] extend spectral clustering with graph encoders, but the resulting problem is somewhat unstable and leads to relatively poor partitions; see Table 3.

**Graph Contrastive Learning:** Recently several papers have explored contrastive Graph Representation Learning based approaches and have demonstrated state-of-the-art performance. Deep Graph Infomax (DGI) [53] is based on MINE [24] method, and is one of the most scalable method with nearly SOTA performance. It uses edge permutations to learn augmentations and embeddings. Info-graph [47] extends the DGI idea to learn unsupervised representations for graphs as well. GraphCL [58] design a framework with four types of graph augmentations for learning unsupervised representations of graph data using a contrastive objective. MVGRL [21] extends these ideas by performing node diffusion and contrasting node representations with augmented graph representations while GRACE [62] maximizes agreement of node embeddings across two corrupted views of the graph. Bootstrapped Graph Latents (BGRL) [48] adapts the BYOL [17] methodology to the graph domain, and eliminates the need for negative sampling by minimizing an invariance based loss for augmented graphs within a batch. While these methods are able to obtain more powerful embeddings, the augmentations and objective function setup become expensive, and hence they are hard to scale to large datasets beyond  $\sim 1M$  nodes. In contrast, S<sup>3</sup>GC is able to provide competitive or better clustering accuracy, while still being scalable to graphs of size 100M nodes.

### 3 S<sup>3</sup>GC: Scalable Self-Supervised Graph Contrastive Clustering

In this section, we first formally introduce the problem of graph clustering and notations. Then we discuss challenges faced by the current methods and outline the framework of our method S<sup>3</sup>GC. Finally, we detail each component of our method and highlight the overall training methodology.

#### 3.1 Problem Statement and Notations

Consider a graph  $G = (V, E)$  with the vertex set  $V = \{v_1, \dots, v_n\}$  and the edge set  $E \subseteq V \times V$ , where  $|E| = m$ . Let  $A \in \mathbb{R}^{n \times n}$  be the adjacency matrix of  $G$ , where  $A_{ij} = 1$  if  $(v_i, v_j) \in E$ , else  $A_{ij} = 0$ . Let  $X \in \mathbb{R}^{n \times d}$  be the node attributes or feature matrix, where the  $i$ -th row  $X_i$  denotes the  $d$ -dimensional feature vector of node  $i$ . Given the graph  $G$  and attributes  $X$ , the aim is to partition the graph  $G$  into  $k$  partitions  $\{G_1, G_2, G_3, \dots, G_k\}$  such that nodes in the same cluster are similar/close to each other in terms of the graph structure as well as in terms of attributes.

Now, in general, one can define several loss functions to evaluate quality of clustering but that might not reflect the underlying ground truth. So, to evaluate the quality of clustering, we use standard benchmarks which have ground truth labels apriori. Furthermore, Normalized Mutual Information (NMI) between the ground truth labels and the estimated cluster labels is used as the key metric. NMI between two labellings  $Y_1$  and  $Y_2$  is defined as:

$$\text{NMI}(Y_1, Y_2) = \frac{2 \cdot I(Y_1, Y_2)}{H(Y_1) + H(Y_2)} \quad (1)$$

where  $I(Y_1, Y_2)$  is the Mutual Information between labellings  $Y_1$  and  $Y_2$ , and  $H(\cdot)$  is the entropy. Normalized Adjacency Matrix is denoted by  $\tilde{\mathbf{A}} = \mathbf{D}^{-\frac{1}{2}} \mathbf{A} \mathbf{D}^{-\frac{1}{2}} \in \mathbb{R}^{n \times n}$  where  $\mathbf{D} = \text{diag}(\mathbf{A} \mathbf{1}_N)$  is the degree matrix. We also compute a  $k$ -hop Diffusion Matrix, denoted by  $\mathbf{S}_k = \sum_{i=0}^k \alpha_i \tilde{\mathbf{A}}^i \in \mathbb{R}^{n \times n}$ , where  $\alpha_i \in [0, 1] \forall i \in [k]$ , and  $\sum_i \alpha_i \leq 1$ . Intuitively,  $k$ -hop diffusion matrix captures a weighted average of  $k$ -hop neighbourhood around every node. For specific  $\alpha_i$  and for  $k = \infty$ , diffusion matrix can be computed in closed form [30, 36]. However, in this work we focus on finite  $k$ .

### 3.2 Challenges in Graph Clustering

Clustering in general is a challenging problem as the underlying function to evaluate quality of the clustering solution is unknown apriori. However, graph partitioning/clustering with attributes poses several more challenges. In particular, scaling the methods is challenging as graphs are sparse data structures, while neural network based approaches produce dense artifacts. Furthermore, it is challenging to effectively combine information from the two data views: graph and the feature attributes. Node2vec [18] uses only graph structure information, DGI [53] and related methods [21, 39] are highly dependent upon attribute quality. Motivated by the above mentioned challenges, we propose  $\text{S}^3\text{GC}$  which uses a self-supervised variant of GNNs.

### 3.3 $\text{S}^3\text{GC}$ : Scalable Self Supervised Graph Clustering – Methodology

At a high level,  $\text{S}^3\text{GC}$  uses a Graph Convolution Network (GCN) based encoder and optimizes it using a contrastive loss where the nodes are sampled via a random walk. Below we describe the three components of  $\text{S}^3\text{GC}$  and then provide the resulting training algorithm.

**Graph Convolutional Encoder:** We use a 1-layer Graph Convolutional Network [28] to encode the graph and feature information for each node:

$$\bar{\mathbf{X}} = \left( \text{PreLU}(\tilde{\mathbf{A}} \mathbf{X} \Theta) + \text{PreLU}(\mathbf{S}_k \mathbf{X} \Theta') + \mathcal{I} \right) \quad (2)$$

where  $\bar{\mathbf{X}} \in \mathbb{R}^{n \times d}$  stores the learned  $d$ -dimensional representation of each node. Recall that  $\tilde{\mathbf{A}}$  is the normalized adjacency matrix and  $\mathbf{S}_k$  is the  $k$ -hop diffusion matrix.  $\mathcal{I} \in \mathbb{R}^{n \times d}$  is a learnable matrix.  $\{\Theta, \Theta'\}$  are the weights of the GCN layer, and  $\text{PreLU}$  is the parameteric ReLU activation function [23]:

$$f(z_i) = z_i \text{ if } z_i \geq 0, f(z_i) = a \cdot z_i \text{ otherwise,} \quad (3)$$

where  $a$  is a learnable parameter. Our choice of encoder makes the method scalable as a 1-layer GCN requires storing only the learnable parameters in the GPU/memory, which is small ( $O(d^2)$ , where  $d$  is the dimensionality of the node attributes). The parameter  $\mathcal{I}$  scales only linearly with the number of nodes  $n$ . More importantly, we use mini-batches that reduce the memory requirement of forward and backward pass to order  $O(rsd + d^2)$  where  $r$  is the batch size in consideration and  $s$  is the average degree of nodes, therefore making our method scalable to graphs of very large sizes as well. We provide further discussion on memory requirement of our method in Section 3.4.

**Random Walk Sampler:** Next, inspired by [40, 18], we utilise biased second order Random Walks with restarts to generate points *similar* to a given node and thus capture the local neighborhood of each node. Formally following [18], we start with a source node  $u$ , and simulate a random walk of length  $l$ . We use  $c_i$  to denote the  $i$ -th node in the random walk starting from  $c_0 = u$ . Every other node in walk  $c_i$  is generated from the distribution:

$$P(c_i = x | c_{i-1} = v) = \frac{\pi_{vx}}{Z}, \text{ if } (v, x) \in E, P(c_i = x | c_{i-1} = v) = 0 \text{ otherwise} \quad (4)$$

where  $\pi_{vx}$  is the unnormalized transition probability between nodes  $v$  and  $x$  and  $Z$  is the normalization constant. To bias the random walks and compute the next edge  $x$  we follow a methodology similar

to [18], and from node  $v$  after traveling  $(t, v)$ , the transition probability  $\pi_{vx}$  is set to  $\alpha_{pq}(t, x) \cdot w_{vx}$  where  $w_{vx}$  is the weight on the edge between  $v$  and  $x$ , and the bias parameter  $\alpha$  is defined by:

$$\alpha_{pq}(t, x) = \frac{1}{p}, \text{ if } d_{tx} = 0, \quad \alpha_{pq}(t, x) = 1, \text{ if } d_{tx} = 1, \quad \alpha_{pq}(t, x) = \frac{1}{q}, \text{ if } d_{tx} = 2, \quad (5)$$

where  $p$  is the *return* parameter, controlling the likelihood of immediately revisiting a node,  $q$  is the *in-out* parameter [18], allowing the search to differentiate between ‘‘inward’’ and ‘‘outward’’ nodes, and  $d_{tx}$  denotes the shortest path distance between nodes  $t$  and  $x$ . We note that  $d_{tx}$  from node  $t$  to  $x$  can only take values  $\in \{0, 1, 2\}$ . Setting  $p$  to a high value ( $> \max(q, 1)$ ) ensures a lesser likelihood of revisiting a node and setting it to a low value ( $< \min(q, 1)$ ) would make the walk more ‘‘local’’. Similarly, setting  $q > 1$  would bias the random walk to nodes near  $t$  and obtain a local view of the graph encouraging BFS-like behaviour, whereas a  $q < 1$  would bias the walk towards nodes further away from  $t$  and encourage DFS-like behaviour.

**Contrastive Loss Formulation:** Now to learn the encoder parameters, we use SimCLR style loss function where nodes generated from the random walk are considered to be *positives* while rest of the samples are considered to be negative. That is, we use graph neighborhood information to produce *augmentations* of a node. Formally, let  $\mathcal{C}(u)^+ = \{c_0, c_1, \dots, c_l\}$  be the nodes generated by a random walk starting at  $c_0 = u$ . Then,  $\mathcal{C}(u)$  is the set of positive samples  $p_u^+$ , while the set of negatives  $p_u^-$  is generated by sampling  $l$  nodes from the remaining set of nodes  $[n] \setminus p_u^+$ . Given  $p_u^+$  and  $p_u^-$ , we can now define the loss for each  $u$  as:

$$\mathcal{L}_{SimCLR}(u) = - \frac{\sum_{v \in p_u^+} \exp(\text{sim}(\bar{\mathbf{X}}_u, \bar{\mathbf{X}}_v))}{\sum_{v \in p_u^+} \exp(\text{sim}(\bar{\mathbf{X}}_u, \bar{\mathbf{X}}_v)) + \sum_{v' \in p_u^-} \exp(\text{sim}(\bar{\mathbf{X}}_u, \bar{\mathbf{X}}_{v'}))} \quad (6)$$

where  $\text{sim}$  is some similarity function, for example inner product:  $\text{sim}(u, v) = \frac{u^T v}{\|u\| \|v\|}$ .

Note that SimCLR style loss functions have been shown to lead to ‘‘linearly separable’’ representations [20] and hence aligns well with the clustering objective [55, 10]. In contrast, loss functions like those used in Node2vec [18] might not necessarily lead to ‘‘clusterable’’ representations which is also indicated by their performance on synthetic as well as real-world datasets.

### 3.4 Algorithm

Now that we have discussed the individual components of our method, we describe the overall training methodology in Algorithm 1. We begin with the initialization of the learnable parameters in line 1. In line 4,5 we generate the positive and negative samples for each node in the current batch. Since we operate with embeddings of only the nodes in batch and their positive/negative samples, we take a union of these to create a ‘‘node set’’ in line 6. This helps in reducing the memory requirements of our algorithm, since we do not do forward/backward pass on the entire  $AX$ , but only on the nodes needed for the current batch. Once we have the node set, we compute representations for the nodes in the current batch using a forward pass in line 8, compute the loss for nodes in this set in line 9, and perform back-propagation to generate the gradient updates for the learnable parameters in line 10. Finally, we update the learnable parameters in line 11 and repeat the process for the next batch.

**Space Complexity:** The space complexity for the forward and backward pass of our algorithm is  $O(rsd + d^2)$ , where  $r$  is the batch size,  $s$  is the average degree of nodes, and  $d$  is the attribute dimension. The process of random walk generation is fast and can be done in memory, which is abundantly available and highly parallelizable. Therefore, storing the graph structure in memory for sampling of positives doesn’t create a memory bottleneck and takes  $O(m)$  space. For all the datasets other than ogbn-papers100M, we store the  $AX$ ,  $SX$ , and  $\mathcal{I}$  in the GPU memory as well, requiring additional  $O(nd)$  space. However, for very large-scale datasets, one can conveniently store these in the memory itself and interface with the GPU when required, thereby restricting the GPU memory requirement to  $O(rsd + d^2)$ .

**Time Complexity:** The forward and backward computation for a given batch takes  $O(rsd^2)$  time. Hence, for  $n$  nodes, batch size of  $r$ , and  $K$  epochs, time complexity is  $O(Knsd^2)$ .

**Embedding property:** Detecting communities ideally requires nodes to be clustered based on their position, rather than structural similarities. We show in Appendix C that S<sup>3</sup>GC produces positional embeddings [46].

**Code:** Implementation code of S<sup>3</sup>GC is available at: <https://github.com/devvrit/S3GC>

---

**Algorithm 1** S<sup>3</sup>GC: Training and Backpropagation

---

**Input:** Graph  $\mathbf{G}$ , Matrices  $\tilde{\mathbf{A}}\mathbf{X} \in \mathbb{R}^{n \times d}$  and  $\mathbf{S}_k\mathbf{X} \in \mathbb{R}^{n \times d}$ , number of epochs  $\mathbf{K}$ , Batched inputs of nodes  $B$ , Self-supervised Loss formulation  $\mathcal{L}_{SimCLR}$ , Encoder definition ENC, Learning Rate  $\eta$

- 1: Initialize model parameters:  $\Theta, \Theta', \mathcal{I}$
- 2: **for** epoch = 1, 2, . . .  $K$  **do**
- 3:   **for** each batch:  $b \in B$  **do**
- 4:     Generate Positive Samples  $p_v^+$  using biased random walks Section 3.3  $\forall v \in b$
- 5:     Generate Negative Samples  $p_v^-$  using random sampling  $\forall v \in b$
- 6:     Compute the node set  $N_b : \text{UNION}(p_v^+, p_v^-) \forall v$
- 7:     Select subset rows  $(\tilde{\mathbf{A}}\mathbf{X})_{N_b}$  and  $(\mathbf{S}_k\mathbf{X})_{N_b}$  corresponding to the node set  $N_b$
- 8:     Forward Pass to compute the representations:  $\bar{\mathbf{X}} \leftarrow \text{ENC}((\tilde{\mathbf{A}}\mathbf{X})_{N_b}, (\mathbf{S}_k\mathbf{X})_{N_b}, \Theta, \Theta', \mathcal{I})$
- 9:     Compute loss using the self-supervised formulation:  $\mathcal{L}(\bar{\mathbf{X}})$
- 10:     Compute Gradients for learnable parameters at time  $t$ :  $\mathbf{u}_t(\Theta, \Theta', \mathcal{I}) \leftarrow \nabla_{\Theta, \Theta', \mathcal{I}} \mathcal{L}(\bar{\mathbf{X}})$
- 11:     Refresh the parameters:  $(\Theta, \Theta', \mathcal{I})_{t+1} \leftarrow (\Theta, \Theta', \mathcal{I})_t - \frac{\eta}{|b|} \mathbf{u}_t(\Theta, \Theta', \mathcal{I})$

**Output:**  $\bar{\mathbf{X}}; \Theta, \Theta', \mathcal{I}$

---

Table 1: **Results on experiments using dataset generated from Stochastic Block Models.** SC represents Spectral Clustering [43] on the graph, k-means utilises only the attributes, Node2vec[18] uses the graph structure and DGI [53] utilizes both. We experiment with two variants of our method S<sup>3</sup>GC- $\mathcal{I}$  using only  $\mathcal{I}$  as the learnable embeddings without using the attributes and S<sup>3</sup>GC using both graph and attributes, and evaluate the quality of clustering using mean NMI, reported over 3 runs.

| SBM Parameters |      |            |          | Baselines: NMI |         |          |      | Our Method: NMI                  |                   |
|----------------|------|------------|----------|----------------|---------|----------|------|----------------------------------|-------------------|
| p              | q    | $\sigma_c$ | $\sigma$ | SC             | k-means | Node2Vec | DGI  | S <sup>3</sup> GC- $\mathcal{I}$ | S <sup>3</sup> GC |
| 0.65           | 0.40 | 0.5        | 1.5      | 0.96           | 0.25    | 0.96     | 0.85 | <b>0.99</b>                      | <b>1.00</b>       |
| 0.63           | 0.45 | 0.5        | 1.5      | 0.45           | 0.25    | 0.47     | 0.55 | <b>0.64</b>                      | <b>0.71</b>       |
| 0.63           | 0.45 | 1.0        | 1.5      | 0.45           | 0.90    | 0.47     | 0.86 | <b>0.64</b>                      | <b>0.91</b>       |

### 3.5 Synthetic Dataset – Stochastic Blockmodel with Gaussian Features

To better understand the working of our method in scenarios with varied quality of the graph structure and node attributes, we propose a study on a synthetic dataset using Stochastic Block Models (SBM)[1] with Gaussian features. For a given parameter  $k$ , the SBM [45] constructs a graph  $G = (V, E)$  with  $k$  partitions of nodes  $V$ . The probability of an intra-cluster edge is  $p$  and an inter-cluster edge is  $q$ , where  $p > q$ .<sup>3</sup> Similar studies have been proposed for benchmarking of GNNs [13] and Graph clustering methods[14, 49] using SBM. In this work, we create an attributed SBM model, where each node has an  $s$ -dimensional attribute associated with it. Following the setup in [49], for  $k$  clusters (partitions) we generate  $k$  cluster centers using  $s$ -multivariate normal distributions  $\mathcal{N}(0_s, \sigma_c^2 \cdot I_s)$ , where  $\sigma_c^2$  is a hyperparameter we define. Then attributes of nodes of a given cluster are sampled from an  $s$ -multivariate gaussian distribution with the corresponding cluster center and  $\sigma^2 I$  variance. The ratio  $\sigma_c^2 / \sigma^2$  controls the expected value of the classical *between* vs *within* sum-of-squares of the clusters.

We compare our method with: k-means on the attributes, Spectral Clustering [43], DGI [53], and Node2vec [18]. This choice of baseline methods focuses on different facets of graph data and clustering across which we want to assess the performance of our method. k-means on attributes utilizes only the nodes attribute information. Spectral Clustering is a non-trainable classical algorithm commonly used for solving SBMs, but uses only the graph-structure information. Similarly, Node2vec is a common graph-embedding trainable algorithm that utilizes only the structural information. DGI is a scalable SOTA self-supervised graph representation learning algorithm that uses both structure as well as node attributes.

To demonstrate the effectiveness of our choice of loss formulation, we also run our method without using any attribute information and using only the learnable embedding  $\mathcal{I} \in \mathbb{R}^{n \times d}$ , i.e.  $\bar{\mathbf{X}} = \mathcal{I}$ .

---

<sup>3</sup>Note that these are parameters for the SBM dataset generation, unrelated to the random walk sampling parameters in the S<sup>3</sup>GC model.

Table 2: **Datasets and Setup.**

| Scale                | Dataset         | # nodes     | # edges       | feat dim | # classes |
|----------------------|-----------------|-------------|---------------|----------|-----------|
| Small Scale          | Cora            | 2,708       | 5,278         | 1,433    | 7         |
|                      | Citeseer        | 3,327       | 4,614         | 3,703    | 6         |
|                      | Pubmed          | 19,717      | 44,325        | 500      | 3         |
| Moderate/Large Scale | ogbn-arxiv      | 169,343     | 1,166,243     | 128      | 40        |
|                      | Reddit          | 232,965     | 23,213,838    | 602      | 41        |
|                      | ogbn-products   | 2,449,029   | 61,859,140    | 100      | 47        |
| Extra-Large Scale    | ogbn-papers100M | 111,059,956 | 1,615,685,872 | 128      | 172       |

**Setup and Observations:** We set the number of nodes  $n = 1000$  and number of clusters  $k = 10$ , where each cluster contains  $n/k = 100$  nodes, and vary  $p$  and  $q$  to generate graphs of different structural qualities. Varying  $\sigma_c^2/\sigma^2$  controls the quality of the attributes. The first row in table 1 represents a graph with high structural as well as attribute quality. The second row represents low structural as well as low attribute quality. While the last row represents low structural but high attribute quality. We make several observations: 1) Even without using any attribute information, our method performs significantly better as compared to other structure-only based methods like Spectral Clustering and Node2Vec, which demonstrates the effectiveness of our loss formulation and training methodology that promotes clusterability, which is also in line with recent observations [10, 55]. 2) We observe that DGI depends highly on the quality of the attributes and is not able to utilize the high-quality graph structure as well, when the attributes are noisy. In contrast, our method uses both sources of information effectively and performs reasonably well even when even only one of the structure or attribute quality is high (first and the last row in the table).

**Visualization of the Embeddings:** We further observe the quality of the generated embeddings using t-SNE[51] projected in 2-dimensions. Figure 1 corresponds to the second setting with weak graph and weak attributes, where we observe that S<sup>3</sup>GC generates representations which are more *cluster-like* as compared to the other methods. Additionally, we note that S<sup>3</sup>GC shows similar behaviour in the other two settings as well, the plots for which are provided in the Appendix.

## 4 Empirical Evaluation

We conduct extensive experiments on several node classification benchmark datasets to evaluate the performance of S<sup>3</sup>GC as compared to key state-of-the-art (SOTA) baselines across multiple facets associated with Graph Clustering.

### 4.1 Datasets and Setup

**Datasets:** We use 3 small scale, 3 moderate/large scale, and 1 extra large scale dataset from GCN [28], GraphSAGE [19] and the OGB-suite [25] to demonstrate the efficacy of our method. The details of the datasets are given in Table 2 and additional details of the sources are mentioned in Appendix.

**Baselines:** We compare our method with k-means on features and 8 recent state-of-the-art baseline algorithms, including MinCutPool [3], METIS [27], Node2vec [18], DGI [53], DMoN [49], GRACE [62], BGRL [48] and MVGRL [21]. We choose baseline methods from a broad spectrum of methodologies, namely methods that utilize only the graph structure, methods that utilize only the features and specific methods that utilize a combination of the graph structure and attribute information to provide an exhaustive comparison across important facets of graph learning and clustering. METIS [27] is a well-known and scalable classical method for graph partitioning using only the structural information. Similarly, Node2vec[18] is another scalable graph embedding technique that utilizes random walks on the graph structure. MinCutPool[3] and DMoN [49] are graph clustering techniques motivated by the normalized MinCut objective [42] and Modularity [35] respectively. DGI is a SOTA self-supervised method utilizing both graph structure and features, that motivated a line of work [21, 39] based on entropy maximization between local and global views of a graph. GRACE[62], in contrast to DGI’s methodology, contrasts embeddings at the node level itself, by forming two views of the graph and maximizing the embedding of the same nodes in the two views. BGRL[48] and MVGRL [21] are recent SOTA methods for performing self-supervised graph representation learning.

**Metrics:** We measure 5 metrics which are relevant for evaluating the quality of the cluster assignments following the evaluation setup of [56, 21]: Accuracy, Normalized Mutual Information (NMI), Completeness Score (CS), Macro-F1 Score (F1), and Adjusted Rand Index (ARI). For all these aforementioned metrics, a higher value indicates better clustering performance. We generate the

representations using each representation-learning method and then perform k-means clustering on the embeddings to generate the cluster assignments used for evaluation of these metrics.

**Detailed Setup.** We consider the unsupervised learning setting for all the seven datasets where the graph and features corresponding to all the datasets are available. We use the labels only for evaluating the quality of the cluster assignments generated by each method. For the baselines, we use the official implementations provided by the authors without any modifications. All experiments are repeated 3 times and the mean values are reported in the Table 3. We highlight the highest value as well as any other values within 1 standard deviation of the mean of the best performing method, and report the results with standard deviations in the Appendix, due to space constraints. We utilize a single Nvidia A100 GPU with 40GB memory for training each method for a maximum duration of 1 hour for each experiment in Table 3. For ogbn-papers100M we allow upto  $\sim 24$  hours of training and upto 300GB main memory in addition. We provide a mini-batched and highly scalable implementation of our method S<sup>3</sup>GC in PyTorch such that experiments on all datasets other than ogbn-papers100M easily fit in the aforementioned GPU. For the ogbn-papers100M dataset, the *forward* and *backward* pass in S<sup>3</sup>GC are performed in the GPU, with an interfacing with the CPU memory to store the graph,  $AX$ , and  $SX$ , and to maintain and update  $\mathcal{I}$ , with minimal overheads. We also provide a comparison of the time and space complexity for each method in the Appendix.

**Hyperparameter Tuning:** S<sup>3</sup>GC requires selection of minimal hyperparameters: we use  $k = 2$  for the k-hop Diffusion Matrix  $S_k$  which offers the following advantages: 1)  $S_2X = \alpha_0X + \alpha_1\tilde{A}X + \alpha_2\tilde{A}^2X$  is a finite computation which can be pre-computed and only requires 2 sparse-dense matrix multiplications. 2) We chose  $\alpha_0 > \alpha_1 > \alpha_2$ , giving a higher weight to 0-hop neighbourhood attributes  $X$  which allows S<sup>3</sup>GC to exploit the rich information from good quality attributes even when the structural information is not very informative. 3) Two-hop neighbourhood intuitively captures all the features of nodes with similar attributes while maintaining scalability. This is motivated by the 2-hop and 3-hop choice of neighborhoods in [19] and [25] for these datasets. We additionally tune the learning rate, batch size and random walk parameters, namely the walk length  $l$  while using the default values of  $p = 1$  and  $q = 1$  for the bias parameters in the walk. We perform model selection based on the NMI on the validation set and evaluate all the metrics for this model. Additional details regarding the hyperparameters are mentioned in the Appendix due to space restrictions.

## 4.2 Results

Table 3 compares clustering performance of S<sup>3</sup>GC to a number of baseline methods on datasets of three different scales. For the small scale datasets, namely Cora, Citeseer and Pubmed, we observe that MVGRL outperforms all methods. We also note that MVGRL’s performance in our experiments, using the author’s official implementation with extensive hyperparameter tuning is slightly lower than the reported values, as has been reported by other works as well [60]. Nonetheless, we use these values for comparison and observe that S<sup>3</sup>GC also performs either competitively or is slightly inferior to MVGRL’s accuracy. For example, on the Cora dataset, S<sup>3</sup>GC is within  $\sim 2\%$  of MVGRL’s performance and outperforms all the other baseline methods, while on the Pubmed dataset, S<sup>3</sup>GC is within  $\sim 1.5\%$  of MVGRL’s performance. Next, we observe the performance on moderate/large scale datasets and note that S<sup>3</sup>GC significantly outperforms baselines such as k-means, MinCutPool, METIS, Node2vec, DGI and DMoN. Notably, S<sup>3</sup>GC is  $\sim 5\%$  better on ogbn-arxiv,  $\sim 1.5\%$  better on Reddit and  $\sim 4\%$  better on ogbn-products in terms of clustering NMI as compared to the next best method. The official implementations of GRACE, BGRL, and MVGRL do not scale to datasets with  $>200k$  nodes, running into Out of Memory (OOM) errors due to the non-scalable implementations, sub-optimal memory utilization, or the non-scalable methodology. For example, MVGRL proposes diffusion matrix as the alternate view of graph structure, which is a dense  $n \times n$  matrix - hence, not scalable.

We also note that S<sup>3</sup>GC performs reasonably well in settings where the node attributes are not very informative while the graph structure is useful, as evident from the performance on the Reddit dataset. k-means on the node attributes gives an NMI of only  $\sim 10\%$  while methods like METIS and Node2vec perform well using the graph structure. Methods like DGI which depend heavily on the quality of the attributes, thus suffer a degradation in performance having a clustering NMI of only  $\sim 30\%$ , while S<sup>3</sup>GC which uses both the attributes and graph information effectively outperforms all the other methods and generates clustering with an NMI of  $\sim 80\%$ .

**ogbn-papers100M:** Finally, we compare the performance of S<sup>3</sup>GC on the extra-large scale dataset with 111M nodes and 1.6B edges in Table 4, and note that only k-means, Node2vec and DGI scale



Table 3: **Comparison of clustering obtained by our method S<sup>3</sup>GC to several state-of-the-art methods.** Metrics for evaluation across different datasets and experiments are Accuracy, NMI, CS, F1 and ARI as described in Section 4. We use the official implementations provided by the authors for all the methods and provide additional details in the Appendix. \* denotes that the method ran Out of Memory (OOM) while trying to run the experiments on the hardware as specified in Section 4. || indicates that the method did not converge.

| Dataset       | Metric   | Baseline |            |       |              |       |       |              |       |              | Ours              |
|---------------|----------|----------|------------|-------|--------------|-------|-------|--------------|-------|--------------|-------------------|
|               |          | k-means  | MinCutPool | METIS | Node2vec     | DGI   | DMoN  | GRACE        | BGRL  | MVGRL        | S <sup>3</sup> GC |
| Cora          | Accuracy | 0.350    | 0.490      | 0.540 | 0.612        | 0.726 | 0.517 | 0.739        | 0.742 | <b>0.763</b> | 0.742             |
|               | NMI      | 0.173    | 0.410      | 0.396 | 0.444        | 0.571 | 0.473 | 0.570        | 0.584 | <b>0.608</b> | 0.588             |
|               | CS       | 0.171    | 0.407      | 0.384 | 0.449        | 0.568 | 0.406 | 0.562        | 0.595 | <b>0.617</b> | 0.586             |
|               | F1       | 0.360    | 0.471      | 0.518 | 0.621        | 0.692 | 0.574 | <b>0.725</b> | 0.691 | 0.716        | <b>0.721</b>      |
|               | ARI      | 0.127    | 0.317      | 0.308 | 0.329        | 0.511 | 0.301 | 0.527        | 0.534 | <b>0.566</b> | <b>0.544</b>      |
| Citeseer      | Accuracy | 0.421    | 0.537      | 0.413 | 0.421        | 0.686 | 0.385 | 0.631        | 0.675 | <b>0.703</b> | 0.688             |
|               | NMI      | 0.199    | 0.295      | 0.17  | 0.240        | 0.435 | 0.303 | 0.399        | 0.422 | <b>0.459</b> | 0.441             |
|               | CS       | 0.205    | 0.296      | 0.167 | 0.264        | 0.436 | 0.251 | 0.398        | 0.423 | <b>0.460</b> | 0.441             |
|               | F1       | 0.394    | 0.516      | 0.400 | 0.401        | 0.643 | 0.437 | 0.603        | 0.631 | <b>0.654</b> | 0.643             |
|               | ARI      | 0.142    | 0.262      | 0.150 | 0.116        | 0.445 | 0.200 | 0.377        | 0.428 | <b>0.471</b> | 0.448             |
| Pubmed        | Accuracy | 0.601    | 0.521      | 0.693 | 0.641        | 0.657 | 0.351 | 0.637        | 0.654 | 0.675        | <b>0.713</b>      |
|               | NMI      | 0.314    | 0.214      | 0.297 | 0.288        | 0.322 | 0.257 | 0.308        | 0.315 | <b>0.345</b> | 0.333             |
|               | CS       | 0.344    | 0.247      | 0.291 | 0.288        | 0.332 | 0.179 | 0.321        | 0.325 | <b>0.355</b> | 0.337             |
|               | F1       | 0.592    | 0.445      | 0.682 | 0.634        | 0.654 | 0.343 | 0.628        | 0.649 | 0.672        | <b>0.703</b>      |
|               | ARI      | 0.281    | 0.175      | 0.323 | 0.258        | 0.292 | 0.108 | 0.276        | 0.285 | 0.310        | <b>0.345</b>      |
| ogbn-arxiv    | Accuracy | 0.176    | 0.242      | 0.209 | 0.290        | 0.314 | 0.250 | *            | 0.227 | *            | <b>0.350</b>      |
|               | NMI      | 0.216    | 0.380      | 0.345 | 0.406        | 0.412 | 0.356 | *            | 0.321 | *            | <b>0.463</b>      |
|               | CS       | 0.198    | 0.344      | 0.312 | 0.370        | 0.379 | 0.326 | *            | 0.293 | *            | <b>0.420</b>      |
|               | F1       | 0.121    | 0.198      | 0.167 | 0.220        | 0.230 | 0.190 | *            | 0.166 | *            | <b>0.230</b>      |
|               | ARI      | 0.074    | 0.139      | 0.126 | 0.190        | 0.223 | 0.127 | *            | 0.130 | *            | <b>0.270</b>      |
| Reddit        | Accuracy | 0.089    |            | 0.524 | 0.709        | 0.224 | 0.529 | *            | *     | *            | <b>0.736</b>      |
|               | NMI      | 0.114    |            | 0.727 | <b>0.792</b> | 0.306 | 0.628 | *            | *     | *            | <b>0.807</b>      |
|               | CS       | 0.112    |            | 0.697 | 0.795        | 0.300 | 0.678 | *            | *     | *            | <b>0.821</b>      |
|               | F1       | 0.068    |            | 0.495 | <b>0.551</b> | 0.183 | 0.260 | *            | *     | *            | <b>0.560</b>      |
|               | ARI      | 0.029    |            | 0.470 | 0.640        | 0.170 | 0.502 | *            | *     | *            | <b>0.745</b>      |
| ogbn-products | Accuracy | 0.200    | 0.257      | 0.294 | 0.357        | 0.320 | 0.304 | *            | *     | *            | <b>0.402</b>      |
|               | NMI      | 0.273    | 0.430      | 0.468 | 0.489        | 0.467 | 0.428 | *            | *     | *            | <b>0.536</b>      |
|               | CS       | 0.236    | 0.360      | 0.401 | 0.425        | 0.405 | 0.367 | *            | *     | *            | <b>0.463</b>      |
|               | F1       | 0.124    | 0.180      | 0.220 | <b>0.247</b> | 0.192 | 0.210 | *            | *     | *            | <b>0.250</b>      |
|               | ARI      | 0.082    | 0.130      | 0.145 | 0.170        | 0.174 | 0.139 | *            | *     | *            | <b>0.230</b>      |

Table 4: **Results of comparison of the embeddings generated by our method S<sup>3</sup>GC as compared to different scalable methods on ogbn-papers100M with 111M nodes and 1.6B edges.**

| Method                        | ogbn-papers100M |              |              |              |              |
|-------------------------------|-----------------|--------------|--------------|--------------|--------------|
|                               | Accuracy        | NMI          | CS           | F1           | ARI          |
| k-means                       | 0.144           | 0.368        | 0.342        | 0.101        | 0.074        |
| Node2vec                      | <b>0.175</b>    | 0.380        | 0.352        | <b>0.099</b> | <b>0.112</b> |
| DGI                           | 0.151           | 0.416        | 0.386        | <b>0.111</b> | 0.096        |
| <b>S<sup>3</sup>GC (Ours)</b> | <b>0.173</b>    | <b>0.453</b> | <b>0.430</b> | <b>0.118</b> | <b>0.110</b> |

to this dataset size and run in a reasonable time of  $\sim 24$  hours. We observe that S<sup>3</sup>GC seamlessly scales to this dataset and significantly outperforms methods utilizing only the features (k-means) by  $\sim 8.5\%$ , only graph structure (Node2vec) by  $\sim 7\%$  and both (DGI) by  $\sim 4\%$  in terms of clustering NMI on the ogbn-papers100M dataset.

**Ablation Study on Hyperparameters:** We perform detailed ablation studies to investigate the stability of S<sup>3</sup>GC’s clustering and provide the same, in the Appendix. We find that S<sup>3</sup>GC is robust to its few hyperparameters such as walk-length and batch size, enabling a near-optimal choice. We note that smaller walk lengths  $\sim 5$  are an optimal choice across datasets, since they are able to include the “right” positive examples in the batch, while using larger walk lengths may degrade the performance due to the inclusion of nodes belonging to other classes in the positive samples. This helps in scalability as well, as we need to sample only a few positives per node. While small batches take more time *per-epoch* but converge faster, larger batch sizes are better in *per-epoch* training time, but require more epochs to converge. Both, however, enjoy similar performance in terms of the quality of the clustering.

### 4.3 Novelty of S<sup>3</sup>GC’s Design Choices

Our design choices have unique roles to play which make S<sup>3</sup>GC both scalable and accurate, by effectively utilizing structure as well as node attribute information for learning clusterable representa-

Table 5: **Comparison between encoder choices.**  $S^3GC_{GCN}$  refers to  $S^3GC$  where we use encoder  $\bar{X} = PreLU(\tilde{A}X\Theta) + PreLU(\tilde{S}_kX\Theta')$ . While  $S^3GC_{\mathcal{I}}$  refers to encoder  $\bar{X} = \mathcal{I}$ . We compare with a structure-only method Node2Vec and an attribute-dependent method DGI.

| Dataset       | Node2Vec | DGI   | $S^3GC_{GCN}$ | $S^3GC_{\mathcal{I}}$ | $S^3GC$ |
|---------------|----------|-------|---------------|-----------------------|---------|
| ogbn-arxiv    | 0.406    | 0.412 | 0.460         | 0.444                 | 0.463   |
| reddit        | 0.792    | 0.306 | 0.777         | 0.808                 | 0.807   |
| ogbn-products | 0.489    | 0.467 | 0.528         | 0.535                 | 0.536   |

tions. We describe their importance and contrast with other possible design choices in this section, highlighting how these choices put together work the most effectively empirically, contributing to  $S^3GC$ 's novelty.

**Encoder:** Using a multilayered GCN[28] to capture local graph structure along with attribute information increases the space required to  $O(nnz(A))$ , making any method non-scalable for very large graphs. This issue is also faced by existing methods like MVGRL [21] which compute the entire diffusion matrix, and hence run into OOM errors on larger datasets as discussed earlier. Hence, we use a 1-layered GCN and precompute  $AX$ , requiring only  $O(nd)$  space. Intuitively, we see that it is important to utilize both the attribute information as well as structural information in the encoder. With this motivation, we design  $S^3GC$  to capture attribute information using a 1-layer GCN and capture structural information using a learnable parameter  $\mathcal{I}$  (eq. (2)). We empirically verify this intuition with experiments using either just the attribute information (for example on the Reddit dataset) or only the structural information (on the ogbn-arxiv dataset) and summarize our findings in Table 5. We find that the design choice of  $S^3GC$ 's Encoder is optimal for effectively capturing both sources of information and removing any one source, leads to considerably suboptimal performance.

**Positive and Negative nodes sampler:** Using a random walk sampler offers several advantages - it can be computed in a scalable fashion and it samples nodes from a  $k$ -hop neighbourhood. We consider several intuitive sampling approaches and discuss the most intuitive and simple sampling approach here: for a given node, we consider all its  $k$ -hop neighbourhood nodes as positives, and  $r$  randomly sampled nodes as negative. This becomes non-scalable, since calculating a  $k$ -hop neighbourhood for all the nodes in the graph has a significant computation cost (it is equivalent to computing non-zero elements in  $A^k$ ). Hence, for simplicity, we experiment with  $k = 1$  and note that on the ogbn-arxiv dataset, using this sampling scheme and a learnable embedding as the encoder  $\bar{X} = \mathcal{I}$  gives only 0.252 NMI. This is significantly lesser than using a random walk generator for sampling and the same encoding scheme  $\bar{X} = \mathcal{I}$ , which gives an NMI of 0.444.

**Loss function** As we already observe in Section 3.5, using the same encoder  $\bar{X} = \mathcal{I}$  but a different loss function gives rise to more clusterable embeddings when using the SimCLR loss as compared to using the Node2Vec loss. The experiments on real-world datasets also reinforce these observations, as we see in Table 5 that  $S^3GC_{\mathcal{I}}$  performs better than Node2Vec on ogbn-arxiv and ogbn-products datasets - where both of the methods use the same encoder and random sampler but different loss functions.

## 5 Discussion and Future Work

We introduced  $S^3GC$ , a new method for scalable graph clustering with node feature side-information.  $S^3GC$  is a simple method based on contrastive learning along with a careful encoding of graph and node features, but it is an effective approach across all scales of data. In particular, we showed that  $S^3GC$  is able to scale to graphs with 100M nodes while still ensuring SOTA clustering performance.

**Limitations and Future Work:**  $S^3GC$  demonstrates empirically that on Stochastic Block Models along with mixture-of-Gaussian features, it is able to identify the clusters accurately. Further theoretical investigation into this standard setting and establishing error bounds for  $S^3GC$  is of interest.  $S^3GC$  can be applied to graphs with heterogeneous nodes, but it cannot explicitly exploit the information. Extension of  $S^3GC$  to cluster graphs while directly exploiting heterogeneity of nodes is another open problem. Finally,  $S^3GC$  like all deep learning methods is susceptible to being unfairly biased by a few "important" nodes. Ensuring stable clustering techniques with minimal bias for a small number of nodes is another interesting direction.

## References

- [1] Carolyn J Anderson, Stanley Wasserman, and Katherine Faust. Building stochastic blockmodels. *Social networks*, 14(1-2):137–161, 1992.
- [2] Muhammed Ali Aydin, Baybars Karabekir, and Abdül Halim Zaim. Energy efficient clustering-based mobile routing algorithm on wsns. *IEEE Access*, 9:89593–89601, 2021.
- [3] Filippo Maria Bianchi, Daniele Grattarola, and Cesare Alippi. Spectral clustering with graph neural networks for graph pooling, 2019.
- [4] Deyu Bo, Xiao Wang, Chuan Shi, Meiqi Zhu, Emiao Lu, and Peng Cui. Structural deep clustering network. In *Proceedings of The Web Conference 2020*, pages 1400–1410, 2020.
- [5] Béla Bollobás, TI Fenner, and AM Frieze. Long cycles in sparse random graphs. *Graph theory and combinatorics (Cambridge, 1983)*, Academic Press, London, pages 59–64, 1984.
- [6] Amar Budhiraja, Gaurush Hiranandani, Darshak Chhatbar, Aditya Sinha, Navya Yarrabelly, Ayush Choure, Oluwasanmi Koyejo, and Prateek Jain. Rich-Item Recommendations for Rich-Users: Exploiting Dynamic and Static Side Information, 2020.
- [7] Mathilde Caron, Piotr Bojanowski, Armand Joulin, and Matthijs Douze. Deep clustering for unsupervised learning of visual features. In *Proceedings of the European conference on computer vision (ECCV)*, pages 132–149, 2018.
- [8] Deepayan Chakrabarti and Christos Faloutsos. Graph mining: Laws, generators, and algorithms. *ACM computing surveys (CSUR)*, 38(1):2–es, 2006.
- [9] Ting Chen, Simon Kornblith, Mohammad Norouzi, and Geoffrey Hinton. A simple framework for contrastive learning of visual representations. In *International conference on machine learning*, pages 1597–1607. PMLR, 2020.
- [10] Ting Chen, Calvin Luo, and Lala Li. Intriguing properties of contrastive losses. *Advances in Neural Information Processing Systems*, 34, 2021.
- [11] Xinlei Chen, Haoqi Fan, Ross Girshick, and Kaiming He. Improved baselines with momentum contrastive learning. *arXiv preprint arXiv:2003.04297*, 2020.
- [12] Inderjit S. Dhillon, Yuqiang Guan, and Brian Kulis. Weighted graph cuts without eigenvectors a multilevel approach. *IEEE Transactions on Pattern Analysis and Machine Intelligence*, 29(11):1944–1957, 2007.
- [13] Vijay Prakash Dwivedi, Chaitanya K. Joshi, Thomas Laurent, Yoshua Bengio, and Xavier Bresson. Benchmarking graph neural networks, 2020.
- [14] Santo Fortunato and Darko Hric. Community detection in networks: A user guide. *Physics Reports*, 659:1–44, 2016. Community detection in networks: A user guide.
- [15] Alan Frieze and Colin McDiarmid. Algorithmic theory of random graphs. *Random Structures & Algorithms*, 10(1-2):5–42, 1997.
- [16] C Lee Giles, Kurt D Bollacker, and Steve Lawrence. Citeseer: An automatic citation indexing system. In *Proceedings of the third ACM conference on Digital libraries*, pages 89–98, 1998.
- [17] Jean-Bastien Grill, Florian Strub, Florent Altché, Corentin Tallec, Pierre Richemond, Elena Buchatskaya, Carl Doersch, Bernardo Avila Pires, Zhaohan Guo, Mohammad Gheshlaghi Azar, et al. Bootstrap your own latent—a new approach to self-supervised learning. *Advances in Neural Information Processing Systems*, 33:21271–21284, 2020.
- [18] Aditya Grover and Jure Leskovec. node2vec: Scalable feature learning for networks. In *Proceedings of the 22nd ACM SIGKDD international conference on Knowledge discovery and data mining*, pages 855–864, 2016.
- [19] Will Hamilton, Zhitaoying, and Jure Leskovec. Inductive representation learning on large graphs. *Advances in neural information processing systems*, 30, 2017.

- [20] Jeff Z HaoChen, Colin Wei, Adrien Gaidon, and Tengyu Ma. Provable guarantees for self-supervised deep learning with spectral contrastive loss. *Advances in Neural Information Processing Systems*, 34, 2021.
- [21] Kaveh Hassani and Amir Hosein Khasahmadi. Contrastive multi-view representation learning on graphs. In *International Conference on Machine Learning*, pages 4116–4126. PMLR, 2020.
- [22] Kaiming He, Haoqi Fan, Yuxin Wu, Saining Xie, and Ross Girshick. Momentum contrast for unsupervised visual representation learning. In *Proceedings of the IEEE/CVF conference on computer vision and pattern recognition*, pages 9729–9738, 2020.
- [23] Kaiming He, Xiangyu Zhang, Shaoqing Ren, and Jian Sun. Delving deep into rectifiers: Surpassing human-level performance on imagenet classification, 2015.
- [24] R Devon Hjelm, Alex Fedorov, Samuel Lavoie-Marchildon, Karan Grewal, Phil Bachman, Adam Trischler, and Yoshua Bengio. Learning deep representations by mutual information estimation and maximization. *arXiv preprint arXiv:1808.06670*, 2018.
- [25] Weihua Hu, Matthias Fey, Marinka Zitnik, Yuxiao Dong, Hongyu Ren, Bowen Liu, Michele Catasta, and Jure Leskovec. Open graph benchmark: Datasets for machine learning on graphs. *Advances in neural information processing systems*, 33:22118–22133, 2020.
- [26] Jyun-Yu Jiang, Patrick H Chen, Cho-Jui Hsieh, and Wei Wang. Clustering and constructing user coresets to accelerate large-scale top-k recommender systems. In *Proceedings of The Web Conference 2020*, pages 2177–2187, 2020.
- [27] George Karypis and Vipin Kumar. Metis: A software package for partitioning unstructured graphs, partitioning meshes, and computing fill-reducing orderings of sparse matrices. 1997.
- [28] Thomas N Kipf and Max Welling. Semi-supervised classification with graph convolutional networks. *arXiv preprint arXiv:1609.02907*, 2016.
- [29] Thomas N Kipf and Max Welling. Variational graph auto-encoders. *arXiv preprint arXiv:1611.07308*, 2016.
- [30] Risi Imre Kondor and John Lafferty. Diffusion kernels on graphs and other discrete structures. In *In Proceedings of the ICML*, pages 315–322, 2002.
- [31] Jure Leskovec and Christos Faloutsos. Sampling from large graphs. In *Proceedings of the 12th ACM SIGKDD international conference on Knowledge discovery and data mining*, pages 631–636, 2006.
- [32] Weibo Liu, Zidong Wang, Xiaohui Liu, Wenbin Yue, and David Bell. A clustering approach to triage categorization in a&e departments. In *2017 23rd International Conference on Automation and Computing (ICAC)*, pages 1–6. IEEE, 2017.
- [33] Stuart Lloyd. Least squares quantization in pcm. *IEEE transactions on information theory*, 28(2):129–137, 1982.
- [34] Tomas Mikolov, Kai Chen, Greg Corrado, and Jeffrey Dean. Efficient estimation of word representations in vector space. *arXiv preprint arXiv:1301.3781*, 2013.
- [35] M. E. J. Newman. Modularity and community structure in networks. *Proceedings of the National Academy of Sciences*, 103(23):8577–8582, 2006.
- [36] L. Page, S. Brin, R. Motwani, and T. Winograd. The pagerank citation ranking: Bringing order to the web. In *Proceedings of the 7th International World Wide Web Conference*, pages 161–172, Brisbane, Australia, 1998.
- [37] Shirui Pan, Ruiqi Hu, Sai-fu Fung, Guodong Long, Jing Jiang, and Chengqi Zhang. Learning graph embedding with adversarial training methods. *IEEE transactions on cybernetics*, 50(6):2475–2487, 2019.

- [38] Jiwoong Park, Minsik Lee, Hyung Jin Chang, Kyuewang Lee, and Jin Young Choi. Symmetric graph convolutional autoencoder for unsupervised graph representation learning. In *Proceedings of the IEEE/CVF International Conference on Computer Vision*, pages 6519–6528, 2019.
- [39] Zhen Peng, Wenbing Huang, Minnan Luo, Qinghua Zheng, Yu Rong, Tingyang Xu, and Junzhou Huang. Graph representation learning via graphical mutual information maximization, 2020.
- [40] Bryan Perozzi, Rami Al-Rfou, and Steven Skiena. Deepwalk: Online learning of social representations. In *Proceedings of the 20th ACM SIGKDD international conference on Knowledge discovery and data mining*, pages 701–710, 2014.
- [41] Prithviraj Sen, Galileo Namata, Mustafa Bilgic, Lise Getoor, Brian Galligher, and Tina Eliassi-Rad. Collective classification in network data. *AI magazine*, 29(3):93–93, 2008.
- [42] Jianbo Shi and J. Malik. Normalized cuts and image segmentation. *IEEE Transactions on Pattern Analysis and Machine Intelligence*, 22(8):888–905, 2000.
- [43] Jianbo Shi and Jitendra Malik. Normalized cuts and image segmentation. *IEEE Transactions on pattern analysis and machine intelligence*, 22(8):888–905, 2000.
- [44] Peter Henry Andrews Sneath and Robert R. Sokal. *Numerical Taxonomy: The Principles and Practice of Numerical Classification*. W. H. Freeman and Co., 1973.
- [45] Tom A. B. Snijders and Krzysztof Nowicki. Estimation and prediction for stochastic blockmodels for graphs with latent block structure. *Journal of Classification*, 14:75–100, 1997.
- [46] Balasubramaniam Srinivasan and Bruno Ribeiro. On the equivalence between positional node embeddings and structural graph representations. 2019.
- [47] Fan-Yun Sun, Jordan Hoffmann, Vikas Verma, and Jian Tang. Infograph: Unsupervised and semi-supervised graph-level representation learning via mutual information maximization. *arXiv preprint arXiv:1908.01000*, 2019.
- [48] Shantanu Thakoor, Corentin Tallec, Mohammad Gheshlaghi Azar, Mehdi Azabou, Eva L Dyer, Remi Munos, Petar Veličković, and Michal Valko. Large-scale representation learning on graphs via bootstrapping. In *International Conference on Learning Representations*, 2021.
- [49] Anton Tsitsulin, John Palowitch, Bryan Perozzi, and Emmanuel Müller. Graph clustering with graph neural networks. *arXiv preprint arXiv:2006.16904*, 2020.
- [50] Wenxuan Tu, Sihang Zhou, Xinwang Liu, Xifeng Guo, Zhiping Cai, Jieren Cheng, et al. Deep fusion clustering network. *arXiv preprint arXiv:2012.09600*, 2020.
- [51] Laurens Van der Maaten and Geoffrey Hinton. Visualizing data using t-sne. *Journal of machine learning research*, 9(11), 2008.
- [52] Petar Veličković, Guillem Cucurull, Arantxa Casanova, Adriana Romero, Pietro Lio, and Yoshua Bengio. Graph attention networks. *arXiv preprint arXiv:1710.10903*, 2017.
- [53] Petar Velickovic, William Fedus, William L Hamilton, Pietro Liò, Yoshua Bengio, and R Devon Hjelm. Deep graph infomax. *ICLR (Poster)*, 2(3):4, 2019.
- [54] Yang Wang, Deepayan Chakrabarti, Chenxi Wang, and Christos Faloutsos. Epidemic spreading in real networks: An eigenvalue viewpoint. In *22nd International Symposium on Reliable Distributed Systems, 2003. Proceedings.*, pages 25–34. IEEE, 2003.
- [55] Colin Wei, Kendrick Shen, Yining Chen, and Tengyu Ma. Theoretical analysis of self-training with deep networks on unlabeled data, 2020.
- [56] Rongkai Xia, Yan Pan, Lei Du, and Jian Yin. Robust multi-view spectral clustering via low-rank and sparse decomposition. *Proceedings of the AAAI Conference on Artificial Intelligence*, 28(1), Jun. 2014.

- [57] Rex Ying, Ruining He, Kaifeng Chen, Pong Eksombatchai, William L Hamilton, and Jure Leskovec. Graph convolutional neural networks for web-scale recommender systems. In *Proceedings of the 24th ACM SIGKDD international conference on knowledge discovery & data mining*, pages 974–983, 2018.
- [58] Yuning You, Tianlong Chen, Yongduo Sui, Ting Chen, Zhangyang Wang, and Yang Shen. Graph contrastive learning with augmentations. *Advances in Neural Information Processing Systems*, 33:5812–5823, 2020.
- [59] Tian Zhang and Usama Fayyad. Birch: a new data clustering algorithm and its applications. *Data Min. Knowl. Disc.*, pages 141–182, 1997.
- [60] Han Zhao, Xu Yang, Zhenru Wang, Erkun Yang, and Cheng Deng. Graph debiased contrastive learning with joint representation clustering. In *Proc. IJCAI*, pages 3434–3440, 2021.
- [61] Yuchen Zhao and Philip S Yu. On graph stream clustering with side information. In *Proceedings of the 2013 SIAM International Conference on Data Mining*, pages 139–150. SIAM, 2013.
- [62] Yanqiao Zhu, Yichen Xu, Feng Yu, Qiang Liu, Shu Wu, and Liang Wang. Deep graph contrastive representation learning. *arXiv preprint arXiv:2006.04131*, 2020.

## Checklist

1. For all authors...
  - (a) Do the main claims made in the abstract and introduction accurately reflect the paper's contributions and scope? [Yes]
  - (b) Did you describe the limitations of your work? [Yes] See Section 5
  - (c) Did you discuss any potential negative societal impacts of your work? [Yes] See Section 5
  - (d) Have you read the ethics review guidelines and ensured that your paper conforms to them? [Yes]
2. If you are including theoretical results...
  - (a) Did you state the full set of assumptions of all theoretical results? [N/A]
  - (b) Did you include complete proofs of all theoretical results? [N/A]
3. If you ran experiments...
  - (a) Did you include the code, data, and instructions needed to reproduce the main experimental results (either in the supplemental material or as a URL)? [Yes] We have provided the github repo where code will be updated.
  - (b) Did you specify all the training details (e.g., data splits, hyperparameters, how they were chosen)? [Yes] see Section 4
  - (c) Did you report error bars (e.g., with respect to the random seed after running experiments multiple times)? [Yes] see Appendix
  - (d) Did you include the total amount of compute and the type of resources used (e.g., type of GPUs, internal cluster, or cloud provider)? [Yes] See Section 4
4. If you are using existing assets (e.g., code, data, models) or curating/releasing new assets...
  - (a) If your work uses existing assets, did you cite the creators? [Yes] See Section 4
  - (b) Did you mention the license of the assets? [N/A]
  - (c) Did you include any new assets either in the supplemental material or as a URL? [No]
  - (d) Did you discuss whether and how consent was obtained from people whose data you're using/curating? [Yes] we use standard benchmarks available publicly
  - (e) Did you discuss whether the data you are using/curating contains personally identifiable information or offensive content? [N/A]
5. If you used crowdsourcing or conducted research with human subjects...
  - (a) Did you include the full text of instructions given to participants and screenshots, if applicable? [N/A]
  - (b) Did you describe any potential participant risks, with links to Institutional Review Board (IRB) approvals, if applicable? [N/A]
  - (c) Did you include the estimated hourly wage paid to participants and the total amount spent on participant compensation? [N/A]

## Appendix

This appendix is segmented into three key parts.

1. **Section A** discusses additional implementation details. In particular, an overview of the  $S^3GC$  method is provided, method-specific overheads are discussed in detail and detailed hyper-parameter settings for our method and the main baselines reported in Table 3 are provided.
2. **Section B** reports additional dataset details, provides additional visualizations, ablation studies and main results with standard deviation values (not included in the main paper due to lack of space).
3. **Appendix C** provides theoretical analysis of the embedding produced by our method.

## A Additional Implementation Details

### A.1 Overview of our method

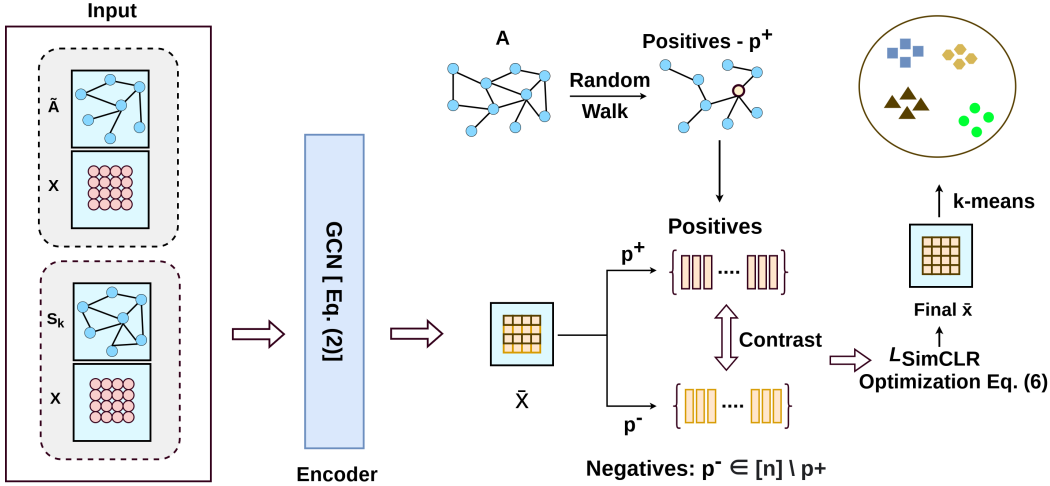

Figure 2: Overview of the proposed method  $S^3GC$

We provide an overview of the architecture and training methodology of  $S^3GC$  in Figure 2.

### A.2 Time and Memory Overheads for Various Methods

Table 6: Time and Space Complexity of different methods

| Method                    | Time Complexity (per epoch)            | Space Complexity                                |
|---------------------------|----------------------------------------|-------------------------------------------------|
| MinCutPool                | $\mathcal{O}(nk + m)$                  | $\mathcal{O}(nk(n + k))$                        |
| METIS                     | $\mathcal{O}(n + m + k \log(k))$       | $\mathcal{O}(n + m)$                            |
| Node2vec                  | $\mathcal{O}(rd)$                      | $\mathcal{O}(nd)$                               |
| DGI                       | $\mathcal{O}(md + nd^2)$               | $\mathcal{O}(m + nd + d^2)$                     |
| DMoN                      | $\mathcal{O}(mk + nk)$                 | $\mathcal{O}(m + nk)$                           |
| GRACE                     | $\mathcal{O}(n^2d + md + d^2)$         | $\mathcal{O}(m + nd)$                           |
| BGRL                      | $\mathcal{O}(md + nd^2)$               | $\mathcal{O}(m + nd + d^2)$                     |
| MVGRL                     | $\mathcal{O}(n^2d + nd^2)$             | $\mathcal{O}(n^2 + nd + d^2)$                   |
| <b><math>S^3GC</math></b> | <b><math>\mathcal{O}(nsd^2)</math></b> | <b><math>\mathcal{O}(nd + rsd + d^2)</math></b> |

In Table 6, we compare the time and space complexities of all the methods used in Table 3, and observe that  $S^3GC$  performs better in terms of both time and memory complexity as compared to the other self-supervised learning methods that utilise both graph and feature information. Recall that  $n$



is the number of nodes in the graph,  $m$  is the number of edges,  $d$  is the dimensionality of features,  $r$  is the batch size,  $k$  is the number of classes, and  $s$  is the average degree per node.

For DGI, GRACE, and BGRL, the mentioned complexities are using full batch training. We use batched training on large datasets for DGI using GraphSAGE[19] which reduces time complexity to  $O(nfd^2)$  and space complexity to  $O(rfd + d^2)$ , which is competitive with our method. Here,  $f$  is the number of sampled neighbours in GraphSAGE per node.

### A.3 Hyperparameter Configurations for our method and the baselines

We use the k-means implementation from sklearn<sup>4</sup>, METIS 5.1.0 from the official source<sup>5</sup> and Node2vec and DGI implementations from PyTorch geometric<sup>6</sup>. The sources for all the relevant baselines and their implementations are mentioned in Table 7

Table 7: URL's and commit numbers to run baseline codes

| Method     | URL                                                                             | Commit  |
|------------|---------------------------------------------------------------------------------|---------|
| MinCutPool | github.com/FilippoMB/MinCutPool                                                 | b27914  |
| Node2vec   | github.com/pyg-team/pytorch_geometric/blob/master/examples/node2vec.py          | 66b1780 |
| DGI        | github.com/pyg-team/pytorch_geometric/blob/master/examples/infomax_inductive.py | 66b1780 |
| DMoN       | github.com/google-research/google-research/tree/master/graph_embedding/dmon     | 16b0d9c |
| GRACE      | github.com/CRIPAC-DIG/GRACE                                                     | 51b4496 |
| BGRL       | github.com/nerdslab/bgrrl                                                       | dec99f8 |
| MVGRL      | github.com/kavehassani/mvgrl                                                    | 628ed2b |

We use the Adam optimizer for S<sup>3</sup>GC and fix the embedding dimension to be the same across methods for a fair comparison, namely we set the embedding dimension  $d$  to be 256 for all the methods for all datasets, except ogbn-papers100M where we use an embedding dimension  $d = 64$  due to memory and scalability constraints. For all the methods we set the number of clusters equal to the number of classes. For trainable methods, a grid search was performed over hyperparameters specific to each method which is summarized below, while the other parameters are set to the default values:

1. **MinCutPool**: Learning Rate - {0.005, 0.001, 0.0005, 0.0001}, Num of Clusters = # of classes
2. **Node2vec**: Learning Rate - {0.01, 0.001}, Walk length - {10, 20, 40, 80}, Context Size - {5, 10, 20, 40}
3. **DGI**: Learning Rate - {0.005, 0.001, 0.0005, 0.0001}, 3-hop Neighborhood sampling size (for large datasets) - {{15, 10, 5}, {25, 20, 10}}
4. **DMoN**: Learning Rate - {0.01, 0.005, 0.001, 0.0005, 0.0001}, Dropout - {0.0, 0.1, 0.2, 0.3, 0.4, 0.5}
5. **GRACE**: all hyperparameters as default provided by the authors for each dataset
6. **BGRL**: Learning Rate - {0.0005, 0.0001, 0.00005, 0.00001}, Dropout - {0.0, 0.1, 0.2, 0.3, 0.4, 0.5, 0.6}
7. **MVGRL**: Learning Rate - {0.005, 0.001, 0.0005, 0.0001}
8. **S<sup>3</sup>GC**: Learning Rate - {0.01, 0.001}, Batch Size - {256, 512, 2048, 4096, 10000, 20000}, Walk Length - {3, 5, 10, 20, 50}, Number of walks per node - {10, 15, 20}

## B Dataset Statistics and Additional Experimental Results

### B.1 Datasets

We use 7 datasets of three different scales of sizes, the statistics for which are provided in Table 2. We provide more information regarding the source and nature of the datasets as follows:

<sup>4</sup><https://scikit-learn.org/stable/modules/generated/sklearn.cluster.KMeans.html>

<sup>5</sup><http://glaros.dtc.umn.edu/gkhome/metis/metis/download>

<sup>6</sup><https://pytorch-geometric.readthedocs.io/>

1. **Cora, Citeseer and Pubmed**<sup>7</sup>: These are three citation network datasets consisting of sparse bag-of-words feature vectors for each document. The edges denote citation links between the documents and are treated as undirected edges following the setup in [28]. Each node has a label class associated with the document.
2. **ogbn-arxiv**<sup>8</sup>: It is a citation dataset from the OGB node property prediction suite [25] representing the network of Computer Science ARXIV papers as indexed by MAG, where each node is a paper and each edge indicates a citation. Each node has an associated label which is one of the subject area from the 40 subject areas in ARXIV Computer Science papers. Feature vectors of the nodes are obtained from an average of word2vec [34] embeddings of the title and abstract.
3. **Reddit**<sup>9</sup>: The dataset is constructed from Reddit posts made in month of September 2014, with each node representing a post and node labels representing the community that the post belonged to. Nodes are connected based on common users commenting on both the posts, and node features are averaged 300-dimensional GloVe word vectors of the content associated with the posts such as title, comments, score and number of comments. More information regarding the setup can be found in [19].
4. **ogbn-products**<sup>10</sup>: It is an Amazon co-purchasing network dataset where nodes represent Amazon products and edges indicate that the two products are purchased together. Each node has an associated label which denotes the category of the product. Node features are dimensionality reduced bag of words features of the product descriptions, following the setup in OGB [25].
5. **ogbn-papers100M**<sup>11</sup>: It is a very large scale citation network dataset consisting of 111 million papers indexed by MAG. Node features and graph structure for this dataset is created in the same way as done for the ogbn-arxiv dataset in OGB [25], while labels are one of the 172 subject areas of a subset of papers published on ARXIV.

## B.2 Visualisation of embeddings for Synthetic Data Experiment

To understand the performance of  $S^3GC$  as compared to the other methods in learning representations on Synthetic datasets, we observe the quality of the generated embeddings using t-SNE[51] projected in 2-dimensions for the setup discussed in Table 1 and Section 3.5. We note that the first row refers to a high quality graph with strong attributes, the second row refers to a weak graph with weak attributes, and the third row refers to a weak graph with strong attributes. We note that all methods perform similarly in the first setting when both the graph and attributes are of good quality, however show varied performance when either or both of them are varied in quality. Hence, Figure 3 visualizes the performance of Node2vec, DGI and  $S^3GC$  in the second and the third settings. We observe from Fig. 3a that Node2vec doesn't learn much distinguishable representations when the quality of the graph is weak, which can be attributed to Node2vec being dependent only on the graph structure for learning embeddings. Note that we also perform an experiment with  $S^3GC$  using only the weak graph information (without using any attributes), denoted by  $S^3GC-\mathcal{I}$  and visualized in Figure 3b. We observe that  $S^3GC-\mathcal{I}$  learns more "cluster-like" representations as compared to Node2vec even when utilizing only the weak quality graph information, indicating that the loss formulation in  $S^3GC$  promotes learning clusterable representations. Then, we compare the performance of DGI and  $S^3GC$  in the second and third settings, and visualize the learnt representations in Figures 3c to 3f. We observe that  $S^3GC$  learns representations that correspond to more well-defined clusters as compared to DGI in each of the settings, indicating that  $S^3GC$  is able to use both the graph and attribute information more efficiently, even in settings with varied data quality.

## B.3 Ablation on Batch Size

To understand the effect of varying the batch size in  $S^3GC$ , we perform an ablation study on the ogbn-arxiv dataset by keeping the other parameters such as learning rate and walk length constant,

<sup>7</sup><https://github.com/tkipf/gcn/tree/master/gcn/data>

<sup>8</sup><https://ogb.stanford.edu/docs/nodeprop/#ogbn-arxiv>

<sup>9</sup><http://snap.stanford.edu/graphsage/reddit.zip>

<sup>10</sup><https://ogb.stanford.edu/docs/nodeprop/#ogbn-products>

<sup>11</sup><https://ogb.stanford.edu/docs/nodeprop/#ogbn-papers100M>

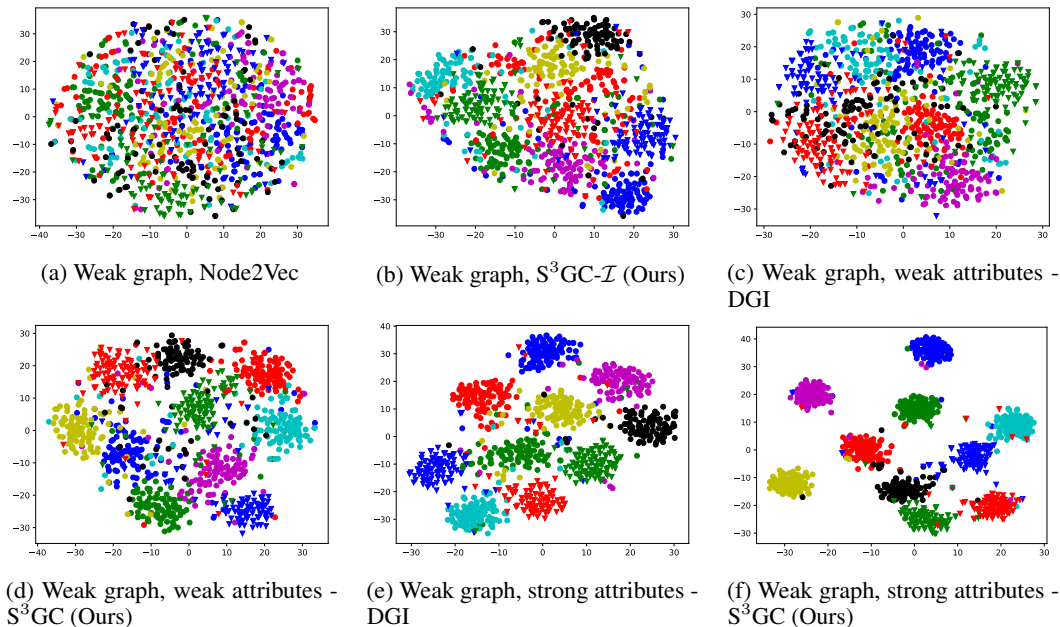

Figure 3: **Visualisation of embeddings.**

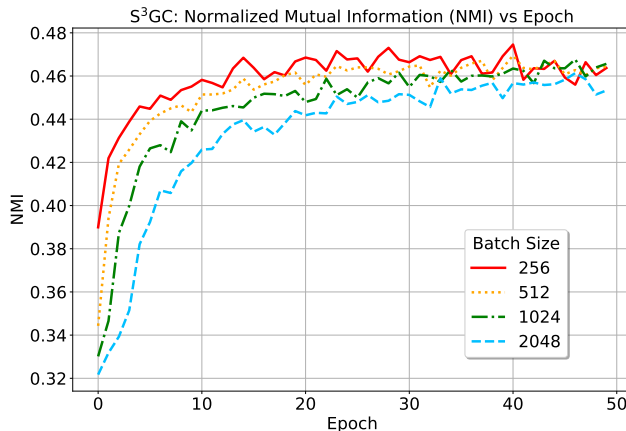

Figure 4: **Ablation study on the effect of using different batch sizes in  $S^3GC$  on the ogbn-arxiv dataset.**

while varying the batch size. We train  $S^3GC$  for different batch sizes from  $\{256, 512, 1024, 2048\}$  and report the clustering NMI vs Epoch performance corresponding to each configuration in Figure 4. We observe that smaller batch sizes show faster convergence, and hence require lesser epochs to reach a reasonably good clustering performance in terms of NMI after which the performance saturates. Larger batches require more epochs however also require lesser per-epoch time as compared to smaller batches. We do note that the final performance corresponding to the different batch sizes are very similar.

#### B.4 Ablation on Walk length

To understand the effect of varying the length of random walks in  $S^3GC$  for the sampling of positives, we perform an ablation study on the ogbn-arxiv dataset by keeping the other parameters such as learning rate and batch size constant, while varying the walk length. We train  $S^3GC$  for different walk lengths from  $\{3, 5, 10, 20, 50, 100\}$  and report the clustering NMI vs Epoch performance corresponding to each configuration in Figure 5. We observe that smaller walk lengths upto  $\sim 5$  show best performance in terms of the clustering NMI, after which the performance starts to degrade

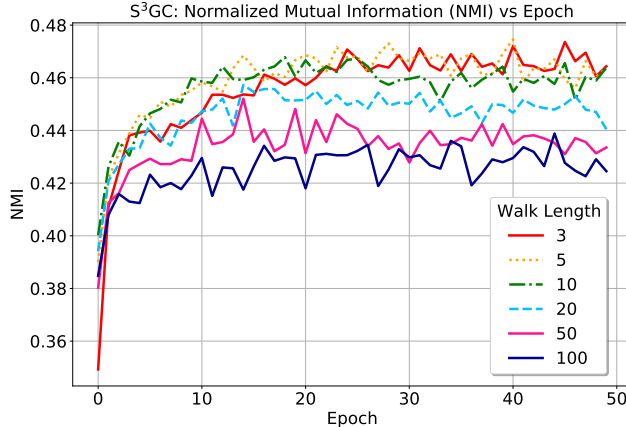

Figure 5: Ablation study on the effect of using different walk lengths in S<sup>3</sup>GC on the ogbn-arxiv dataset.

with larger walk lengths. This can be attributed to the inclusion of unrelated or “farther-away” nodes belonging to different classes as positives in the batch. We also observe that the walk length parameter  $\sim 5$  is optimal across datasets and hence does not require significant hyperparameter tuning.

### B.5 Main table results with mean and standard deviation values

We provide detailed results for all the methods with mean and standard deviation values in the evaluation of all the metrics across datasets, in Table 8 and Table 10 respectively. We observe similar results as discussed in the main paper.

Table 8: Results of comparison of the embeddings generated by our method S<sup>3</sup>GC as compared to different scalable methods on ogbn-papers100M with 111M nodes and 1.6B edges, with mean and std values.

| Method                        | ogbn-papers100M    |                    |                    |                    |                    |
|-------------------------------|--------------------|--------------------|--------------------|--------------------|--------------------|
|                               | Accuracy           | NMI                | CS                 | F1                 | ARI                |
| k-means                       | 0.144±0.004        | 0.368±0.004        | 0.342±0.003        | 0.101±0.004        | 0.074±0.007        |
| Node2vec                      | <b>0.175±0.005</b> | 0.380±0.004        | 0.352±0.004        | <b>0.099±0.009</b> | <b>0.112±0.009</b> |
| DGI                           | 0.151±0.005        | 0.416±0.005        | 0.386±0.003        | <b>0.111±0.010</b> | 0.096±0.008        |
| <b>S<sup>3</sup>GC (Ours)</b> | <b>0.173±0.004</b> | <b>0.453±0.005</b> | <b>0.430±0.003</b> | <b>0.118±0.004</b> | <b>0.110±0.007</b> |

### B.6 Ablation on the encoder components

We provide ablation on different components of the encoder used in S<sup>3</sup>GC and their affect. The encoder has three parts: a)  $\sigma(AX\theta)$ , b)  $\sigma(SX\theta')$ , and c)  $\mathcal{I}$ , where  $\sigma = PReLU$  activation. We study each combination’s affect on Cora, Citeseer, Pubmed, ogbn-arxiv, Reddit, and ogbn-products in Table 9. We see that having only attribute information can cause suboptimal performance where attributes aren’t strong enough, for example in Reddit dataset. While using only attribute information will not take benefit of attributes at all, like in Cora, Citeseer, ogbn-arxiv, and ogbn-products. The use of diffusion matrix  $S$  seem to be more helpful in smaller datasets like Cora and Pubmed, but does provide marginal benefits in larger datasets like ogbn-arxiv and ogbn-products. In order to save memory, one can remove  $\sigma(SX\theta')$  and still have reasonable good performance.

## C Theoretical analysis of embedding properties

A recent work [46] formalizes the concept of Positional and Structural embeddings, their properties, and their relation to each other. In this section, we follow the conceptual description from this work and prove that S<sup>3</sup>GC produces positional embeddings rather than structural embeddings. The problem of community detection utilizes the close-knit behavior of nodes in one community, and

Table 9: **Results of different combinations of S<sup>3</sup>GC encoder.** The reported numbers are NMI on clustering  $k=\#\text{clusters}$  of the respective dataset.  $\sigma$  is PReLU activation

| Encoder                                             | Cora  | Citeseer | Pubmed | ogbn-arxiv | reddit | ogbn-products |
|-----------------------------------------------------|-------|----------|--------|------------|--------|---------------|
| $\mathcal{I}$                                       | 0.350 | 0.005    | 0.174  | 0.444      | 0.808  | 0.535         |
| $\sigma(AX\theta)$                                  | 0.561 | 0.430    | 0.331  | 0.457      | 0.775  | 0.533         |
| $\sigma(SX\theta')$                                 | 0.568 | 0.428    | 0.352  | 0.440      | 0.707  | 0.500         |
| $\sigma(AX\theta) + \sigma(SX\theta')$              | 0.572 | 0.423    | 0.330  | 0.460      | 0.777  | 0.528         |
| $\sigma(AX\theta) + \mathcal{I}$                    | 0.575 | 0.426    | 0.327  | 0.459      | 0.810  | 0.531         |
| $\sigma(SX\theta) + \mathcal{I}$                    | 0.580 | 0.431    | 0.330  | 0.460      | 0.806  | 0.540         |
| $\sigma(AX\theta) + \sigma(SX\theta) + \mathcal{I}$ | 0.588 | 0.441    | 0.333  | 0.463      | 0.807  | 0.536         |

Table 10: **Comparison of clustering obtained by our method S<sup>3</sup>GC to several state-of-the-art methods, with mean and std values.** Metrics for evaluation across different datasets and experiments are Accuracy, NMI, CS, F1 and ARI as described in Section 4. We use the official implementations provided by the authors for all the methods and as mentioned in the Appendix Section A.3. \* denotes that the method ran Out of Memory (OOM) while trying to run the experiments on the hardware as specified in Section 4. || indicates that the method did not converge.

| Dataset       | Metric   | Baseline    |             |             |                    |             |             |                    |             | Ours               |                    |
|---------------|----------|-------------|-------------|-------------|--------------------|-------------|-------------|--------------------|-------------|--------------------|--------------------|
|               |          | k-means     | MinCutPool  | METIS       | Node2vec           | DGI         | DMoN        | GRACE              | BGRL        | MVGRL              | S <sup>3</sup> GC  |
| Cora          | Accuracy | 0.350±0.017 | 0.490±0.025 | 0.540±0.015 | 0.612±0.011        | 0.726±0.017 | 0.517±0.029 | 0.739±0.010        | 0.742±0.015 | <b>0.763±0.013</b> | 0.742±0.008        |
|               | NMI      | 0.173±0.015 | 0.410±0.021 | 0.396±0.014 | 0.444±0.007        | 0.571±0.013 | 0.473±0.010 | 0.570±0.012        | 0.584±0.011 | <b>0.608±0.010</b> | 0.588±0.009        |
|               | CS       | 0.171±0.015 | 0.407±0.021 | 0.384±0.016 | 0.449±0.005        | 0.568±0.013 | 0.406±0.006 | 0.562±0.012        | 0.595±0.015 | <b>0.617±0.014</b> | 0.586±0.013        |
|               | F1       | 0.360±0.014 | 0.471±0.030 | 0.518±0.015 | 0.621±0.009        | 0.692±0.02  | 0.574±0.041 | <b>0.725±0.008</b> | 0.691±0.010 | <b>0.716±0.014</b> | <b>0.721±0.015</b> |
|               | ARI      | 0.127±0.010 | 0.317±0.031 | 0.308±0.013 | 0.329±0.024        | 0.511±0.04  | 0.301±0.012 | 0.527±0.012        | 0.534±0.015 | <b>0.566±0.014</b> | <b>0.544±0.012</b> |
| Citeseer      | Accuracy | 0.421±0.009 | 0.537±0.034 | 0.413±0.010 | 0.421±0.011        | 0.686±0.010 | 0.385±0.017 | 0.631±0.003        | 0.675±0.009 | <b>0.703±0.014</b> | 0.688±0.010        |
|               | NMI      | 0.199±0.010 | 0.295±0.040 | 0.170±0.015 | 0.240±0.007        | 0.435±0.009 | 0.303±0.027 | 0.399±0.003        | 0.422±0.013 | <b>0.459±0.010</b> | 0.441±0.011        |
|               | CS       | 0.205±0.009 | 0.296±0.041 | 0.167±0.011 | 0.264±0.011        | 0.436±0.008 | 0.251±0.022 | 0.398±0.004        | 0.423±0.010 | <b>0.460±0.013</b> | 0.441±0.010        |
|               | F1       | 0.394±0.011 | 0.516±0.055 | 0.400±0.010 | 0.401±0.016        | 0.643±0.009 | 0.437±0.024 | 0.603±0.002        | 0.631±0.011 | <b>0.654±0.011</b> | 0.643±0.009        |
|               | ARI      | 0.142±0.012 | 0.262±0.023 | 0.150±0.013 | 0.116±0.014        | 0.445±0.016 | 0.200±0.028 | 0.377±0.003        | 0.428±0.012 | <b>0.471±0.013</b> | 0.448±0.009        |
| Pubmed        | Accuracy | 0.601±0.005 | 0.521±0.042 | 0.693±0.008 | 0.641±0.003        | 0.657±0.010 | 0.351±0.018 | 0.637±0.004        | 0.654±0.010 | 0.675±0.011        | <b>0.713±0.009</b> |
|               | NMI      | 0.314±0.007 | 0.214±0.025 | 0.297±0.009 | 0.288±0.008        | 0.322±0.008 | 0.257±0.019 | 0.308±0.003        | 0.315±0.009 | <b>0.345±0.010</b> | 0.333±0.010        |
|               | CS       | 0.344±0.007 | 0.247±0.027 | 0.291±0.009 | 0.288±0.008        | 0.332±0.007 | 0.179±0.013 | 0.321±0.002        | 0.325±0.008 | <b>0.355±0.009</b> | 0.337±0.008        |
|               | F1       | 0.592±0.006 | 0.445±0.035 | 0.682±0.007 | 0.634±0.005        | 0.654±0.009 | 0.343±0.021 | 0.628±0.008        | 0.649±0.011 | 0.672±0.010        | <b>0.703±0.009</b> |
|               | ARI      | 0.281±0.008 | 0.175±0.030 | 0.323±0.010 | 0.258±0.009        | 0.292±0.020 | 0.108±0.012 | 0.276±0.005        | 0.285±0.010 | 0.310±0.011        | <b>0.345±0.009</b> |
| ogbn-arxiv    | Accuracy | 0.176±0.004 | 0.242±0.010 | 0.209±0.009 | 0.290±0.012        | 0.314±0.019 | 0.250±0.007 | *                  | 0.227±0.010 | *                  | <b>0.350±0.012</b> |
|               | NMI      | 0.216±0.004 | 0.380±0.008 | 0.345±0.007 | 0.405±0.003        | 0.412±0.008 | 0.356±0.008 | *                  | 0.321±0.005 | *                  | <b>0.463±0.003</b> |
|               | CS       | 0.198±0.004 | 0.344±0.007 | 0.312±0.007 | 0.370±0.002        | 0.379±0.005 | 0.326±0.009 | *                  | 0.293±0.006 | *                  | <b>0.420±0.004</b> |
|               | F1       | 0.121±0.005 | 0.198±0.009 | 0.167±0.008 | 0.220±0.005        | 0.230±0.009 | 0.190±0.005 | *                  | 0.166±0.007 | *                  | <b>0.230±0.009</b> |
|               | ARI      | 0.074±0.005 | 0.139±0.005 | 0.126±0.009 | 0.190±0.014        | 0.223±0.027 | 0.127±0.003 | *                  | 0.130±0.012 | *                  | <b>0.270±0.016</b> |
| Reddit        | Accuracy | 0.089±0.004 |             | 0.524±0.013 | 0.709±0.051        | 0.224±0.009 | 0.529±0.025 | *                  | *           | *                  | <b>0.736±0.022</b> |
|               | NMI      | 0.114±0.003 |             | 0.727±0.014 | <b>0.792±0.021</b> | 0.306±0.012 | 0.628±0.035 | *                  | *           | *                  | <b>0.807±0.011</b> |
|               | CS       | 0.112±0.003 |             | 0.697±0.015 | 0.795±0.018        | 0.300±0.012 | 0.678±0.032 | *                  | *           | *                  | <b>0.821±0.011</b> |
|               | F1       | 0.068±0.005 |             | 0.495±0.020 | <b>0.551±0.020</b> | 0.183±0.010 | 0.260±0.030 | *                  | *           | *                  | <b>0.560±0.013</b> |
|               | ARI      | 0.029±0.003 |             | 0.470±0.019 | 0.640±0.073        | 0.170±0.023 | 0.502±0.040 | *                  | *           | *                  | <b>0.745±0.023</b> |
| ogbn-products | Accuracy | 0.200±0.004 | 0.257±0.017 | 0.294±0.006 | 0.357±0.011        | 0.320±0.012 | 0.304±0.007 | *                  | *           | *                  | <b>0.402±0.012</b> |
|               | NMI      | 0.273±0.004 | 0.430±0.020 | 0.468±0.005 | 0.489±0.006        | 0.467±0.006 | 0.428±0.008 | *                  | *           | *                  | <b>0.536±0.003</b> |
|               | CS       | 0.236±0.003 | 0.360±0.020 | 0.401±0.005 | 0.425±0.006        | 0.405±0.006 | 0.367±0.005 | *                  | *           | *                  | <b>0.463±0.003</b> |
|               | F1       | 0.124±0.004 | 0.180±0.010 | 0.220±0.006 | <b>0.247±0.007</b> | 0.192±0.010 | 0.210±0.008 | *                  | *           | *                  | <b>0.250±0.009</b> |
|               | ARI      | 0.082±0.005 | 0.130±0.015 | 0.145±0.007 | 0.170±0.009        | 0.174±0.011 | 0.139±0.004 | *                  | *           | *                  | <b>0.230±0.015</b> |

hence positional embeddings encourage such nodes to be clustered together owing to their positional proximity in the original graph.

Before we prove our result, we introduce some basic notations, borrowing from [46]. Readers are encouraged to refer to [46] for a more detailed description of the definitions and the background.

We consider a graph  $G = (V, X, E)$ , where  $V$  is the set of nodes and  $|V| = n$ ,  $E \in \mathbb{R}^{n \times n}$  is the set of edges in  $V \times V$ , and  $X \in \mathbb{R}^{n \times d}$  are node attributes. Let  $A \in \mathbb{R}^{n \times n}$  be the corresponding adjacency matrix.

**Definition 1** (Definition 2, [46] - Permutation Action  $\pi$ ). *A permutation action  $\pi$  is a function that acts on any vector, matrix, or tensor defined over the nodes  $V$ , e.g.,  $(Z_i)_{i \in V}$ , and outputs an equivalent vector, matrix, or tensor with the order of the nodes permuted. We define  $\Pi_n$  as the set of all  $n!$  such permutation actions.*

**Definition 2** (Definition 3, [46] - Orbits). *An orbit is the result of a group action  $\Pi_n$  acting on elements of a group corresponding to bijective transformations of the space that preserve some structure of the space. The orbit of an element is the set of equivalent elements under action  $\Pi_n$ , i.e.,  $\Pi_n(x) = \{\pi(x) | \pi \in \Pi_n\}$ .*

**Definition 3** (Definition 4, [46] - G-equivariant and G-invariant functions). *Let  $\Sigma_n$  be the set of all possible attributed graphs  $G$  of size  $n \geq 1$ . More formally,  $\Sigma_n$  is the set of all tuples  $(A, X)$  with adjacency tensors  $A$  and corresponding node attributes  $X$  for  $n$  nodes. A function  $g : \Sigma_n \rightarrow \mathbb{R}^{n \times \cdot}$  is G-equivariant w.r.t. valid permutations of the nodes  $V$ , whenever any permutation action  $\pi \in \Pi_n$  in the  $\Sigma_n$  space associates with the same permutation action of the nodes in the  $\mathbb{R}^{n \times \cdot}$  space. A function  $g : \Sigma_n \rightarrow \mathbb{R}^{n \times \cdot}$  is G-invariant whenever it is invariant to any permutation action  $\pi \in \Pi_n$  in  $\Sigma_n$ .*

**Definition 4** (Definition 5, [46] - Graph orbits and Graph isomorphism). *Let  $G = (A, X)$  be a graph with  $n$  nodes, and let  $\Pi_n(G) = \{(A', X') : (A', X') = (\pi(A), \pi(X)), \forall \pi \in \Pi_n\}$  be the set of all equivalent (isomorphic) graphs under the permutation action  $\pi$ . Two graphs  $G_1 = (A_1, X_1)$  and  $G_2 = (A_2, X_2)$  are said isomorphic iff  $\Pi_n(G_1) = \Pi_n(G_2)$ .*

**Definition 5** (Definition 6, [46] - Node orbits & Node isomorphism). *The equivalence classes of the vertices of a graph  $G$  under the action of automorphisms are called vertex orbits. If two nodes are in the same node orbit, we say that they are isomorphic.*

Intuitively, Definition 5 says that two nodes are isomorphic if the ‘‘view’’ of the graph with respect to these nodes are the same. In other words, if the nodes’ identities’ are hidden, one can’t distinguish between two isomorphic nodes as the graph structure would look exactly the same with respect to their positions.

**Definition 6** (Definition 8, [46] - Structural node representations). *The structural representation of node  $v \in V$  in a graph  $G = (A, X)$  is the  $G$ -invariant representation  $\Gamma(v, A, X)$ , where  $\Gamma : V \times \Sigma_n \rightarrow \mathbb{R}^d, d \geq 1$  such that  $\forall u \in V, \Gamma((u, A, X)) = \Gamma(\pi(u), \pi(A), \pi(X))$  for all permutation actions  $\forall \pi \in \Pi_n$ . Moreover, for any two isomorphic nodes  $u, v \in V, \Gamma(u, A, X) = \Gamma(v, A, X)$ .*

Intuitively, Definition 6 implies that all isomorphic nodes (nodes which are structurally same) have the same embedding, and this embedding is independent of the permutation of nodes and node features input to the embedding function  $\Gamma$ . We now define positional embedding.

**Definition 7** (Definition 12 [46], (Positional) Node embedding). *The (positional) node embeddings of a graph  $G = (A, X)$  are defined as joint samples of random variables  $(Z_i)_{i \in V} | A, X \sim p(\cdot | A, X), Z_i \in \mathbb{R}^d, d \geq 1$ , where  $p(\cdot | A, X)$  is a  $G$ -equivariant probability distribution on  $A$  and  $X$ , that is,  $\pi(p(\cdot | A, X)) = p(\cdot | \pi(A), \pi(X))$  for any permutation  $\pi \in \Pi_n$ .*

Definition 7 says that for a given node, the distribution of its embedding remains the same under permutation.

We now prove that  $S^3GC$  gives positional embeddings and not structural embeddings. For simplicity, let us assume that given a fixed initialization of  $\Theta, \Theta', \mathcal{I}$  (eq. (2)), the algorithm is deterministic. The assumption doesn’t affect the final result, as the randomness over a random sampler would simply result in an additional expectation while giving the same final result.

First, notice that our model is permutation equivariant. Given  $(A, X)$  or  $(\pi(A), \pi(X))$  and a fixed initialization, our training will result in the embeddings being learnt as  $\bar{X}$  and  $\pi(\bar{X})$  respectively. This is because with permutations, the structure of the graph doesn’t change. Hence, positive and negative node sampler will receive the same neighbourhood for any node, and would sample nodes in the same fashion. Also, the embedding output of encoder simply gets permuted:

$$\begin{aligned} Encoder &= PreLU(\pi(A)\pi(X)\Theta) + PreLU(\pi(S)\pi(X)\Theta') + \pi(\mathcal{I}) \\ &= \pi(PreLU(AX\Theta)) + \pi(PreLU(SX\Theta')) + \pi(\mathcal{I}) \\ &= \pi(PreLU(AX\Theta) + (PreLU(SX\Theta') + \mathcal{I})) \\ &= \pi(\bar{X}) \end{aligned}$$

Now, given the initialization  $\Theta \sim \mathcal{N}(0, I), \Theta' \sim \mathcal{N}(0, I), \mathcal{I} \sim \mathcal{N}(0, I)$ , a deterministic permutation equivariant function will result in permutation equivariant output distributions. Thus, we can say that  $\pi(p(\cdot | (A, X))) = p(\cdot | \pi(A), \pi(X))$ . Having randomness over a random sampler hence keeps the above property intact, owing to the permutation equivariant way of training.

We now show that our method doesn’t produce structural embedding. We can take a toy example to demonstrate this. Let us consider a graph  $G$  consisting of two disconnected cliques of equal size. Let’s also say that  $X = 0$ . Therefore, our method will boil down to a contrastive learning framework similar to Node2Vec, where we initialize  $\mathcal{I} \sim \mathcal{N}(0, I)$ . But because any two nodes in the two different cliques are always negative samples of each other, the contrastive loss forces them to be dissimilar. Thus, structurally symmetric nodes in two different cliques do not learn the same embedding and hence our method does not produce structural embeddings.
